# Supplementary material for: Modulated expression of adhesion, migration and activation molecules may predict the degree of response in chronic lymphocytic leukemia patients treated with ibrutinib plus rituximab
Source: PubMed Central journal article supplement — Haematologica. 2020 Oct 5;106(5):1500–3. doi: 10.3324/haematol.2020.262071 (PMC8094098; doi:10.3324/haematol.2020.262071), 2020-10-05
Supplement: 2020_262071-DisclosuresContributions.pdf [file 2020_262071-DisclosuresContributions.pdf]

Haematologica  
HAEMATOL/2020/262071  
Version 4

Modulated expression of adhesion, migration and activation molecules  
may predict the degree of response in chronic lymphocytic leukemia  
patients treated with ibrutinib plus rituximab

Nadia Peragine, Maria Stefania De Propris, Stefania Intoppa, Maria  
Laura Milani, Paola Mariglia, Francesca Romana Mauro, Sara Raponi,  
Stefano Soddu, Antonio Cuneo, Gian Matteo Rigolin, Ilaria Del Giudice,  
Robin Foà, and Anna Guarini

Disclosures: 'None'

Contributions: NP, RF, AG designed the research study; MSDP, SI, MLM, PM, SR carried  
out the lab work, MSDP, FRM, SS, AC, GMR, IDG analyzed the data, NP, RF, AG wrote  
the paper.
